# Supplementary material
Source: publisher site journal article supplement (https://www.dovepress.com/article/355554)

## Supplementary leaflet

Front page and some feature of the app

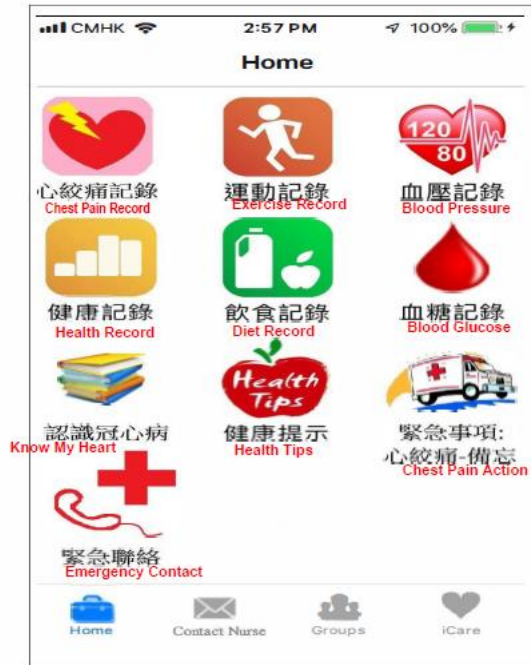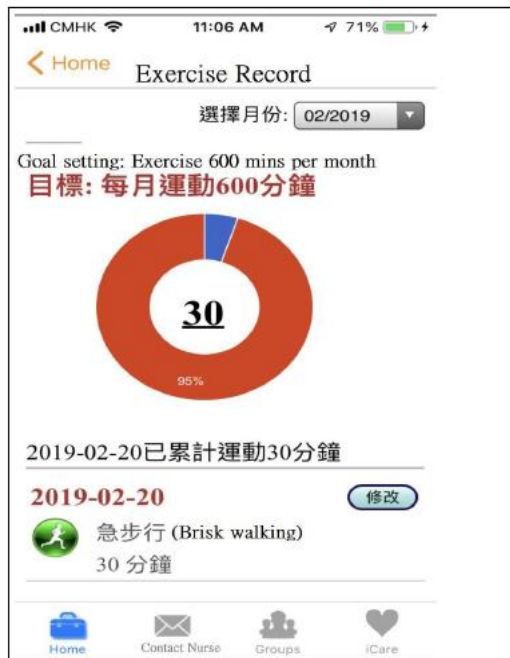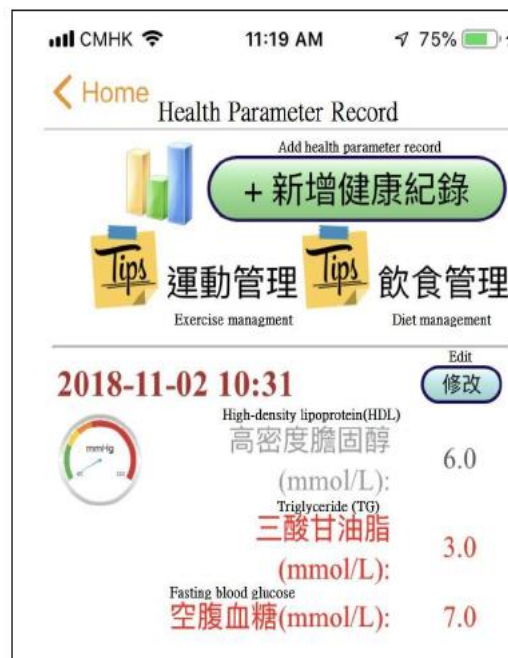

Supplement: Supplementary file 1 [file get_supplementary_file.php]
